# Supplementary material for: Single-cell transcriptomics links malignant T cells to the tumor immune landscape in cutaneous T cell lymphoma
Source: PubMed Central journal article supplement (PMC8894386; doi:10.1038/s41467-022-28799-3), 2022-03-03
Supplement: 41467_2022_28799_MOESM1_ESM.pdf [file 41467_2022_28799_MOESM1_ESM.pdf]

## Supplementary Figures and Tables

### Single-cell transcriptomics links malignant T cells to the tumor immune landscape in cutaneous T cell lymphoma

Xiangjun Liu<sup>1,2,3,13</sup>, Shanzhao Jin<sup>4,5,13</sup>, Simeng Hu<sup>4,6,13</sup>, Ruoyan Li<sup>4,7</sup>, Haihao Pan<sup>1,2,3</sup>, Yi Liu<sup>4</sup>, Pan Lai<sup>1,2,3</sup>, Deshu Xu<sup>4</sup>, Jingru Sun<sup>1,2,3</sup>, Ziyang Liu<sup>4</sup>, Yumei Gao<sup>1,2,3</sup>, Yifan Zhao<sup>4</sup>, Fengjie Liu<sup>1,2,3</sup>, Yu Xiao<sup>1,2,3</sup>, Yingyi Li<sup>1,2,3</sup>, Yujie Wen<sup>1,2,3</sup>, Zhuojing Chen<sup>1,2,3</sup>, Bufang Xu<sup>1,2,3</sup>, Yuchieh Lin<sup>1,2,3</sup>, Menglong Ran<sup>1,2,3</sup>, Qianxi Li<sup>1,2,3</sup>, Shuxia Yang<sup>1,2,3</sup>, Hang Li<sup>1,2,3</sup>, Ping Tu<sup>1,2,3</sup>, Muzlifah Haniffa<sup>7,8,9</sup>, Sarah A. Teichmann<sup>7,10</sup>, Fan Bai<sup>4,11,12\*</sup>, Yang Wang<sup>1,2,3\*</sup>

<sup>1</sup>Department of Dermatology and Venerology, Peking University First Hospital, Beijing 100034, China.

<sup>2</sup>Beijing Key Laboratory of Molecular Diagnosis on Dermatoses, Beijing 100034, China.

<sup>3</sup>National Clinical Research Center for Skin and Immune Diseases, Beijing 100034, China.

<sup>4</sup>Biomedical Pioneering Innovation Center (BIOPIC), and School of Life Sciences, Peking University, Beijing 100871, China.

<sup>5</sup>BioMap (Beijing) Intelligence Technology Limited, Block C Information Center Haidian District, Beijing, 100086, China

<sup>6</sup>Academy for Advanced Interdisciplinary Studies (AAIS), and Peking University–Tsinghua University–National Institute of Biological Sciences Joint Graduate Program (PTN), Peking University, Beijing 100871, China

<sup>7</sup>Wellcome Sanger Institute, Wellcome Genome Campus, Hinxton, Cambridge CB10 1SA, UK.

<sup>8</sup>Biosciences Institute, Newcastle University, Newcastle upon Tyne NE2 4HH, UK.

<sup>9</sup>Department of Dermatology and NIHR Newcastle Biomedical Research Centre, Newcastle Hospitals NHS Foundation Trust, Newcastle upon Tyne NE2 4LP, UK.

<sup>10</sup>Theory of Condensed Matter Group, Cavendish Laboratory/Department of Physics, University of Cambridge, Cambridge CB3 0HE, UK.

<sup>11</sup>Beijing Advanced Innovation Center for Genomics (ICG), Peking University, Beijing, China

<sup>12</sup>Center for Translational Cancer Research, First Hospital, Peking University, Beijing 100871, China.

<sup>13</sup>These authors contributed equally to this manuscript.

\*Address correspondence to: Yang Wang ([yangwang\\_dr@bjmu.edu.cn](mailto:yangwang_dr@bjmu.edu.cn)) and Fan Bai ([fbai@pku.edu.cn](mailto:fbai@pku.edu.cn))

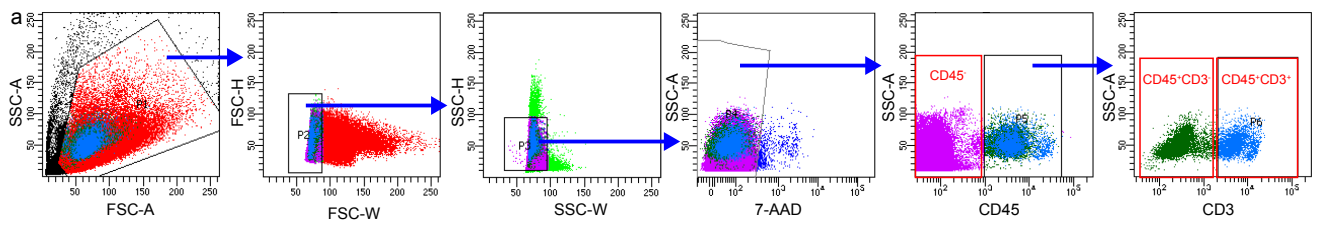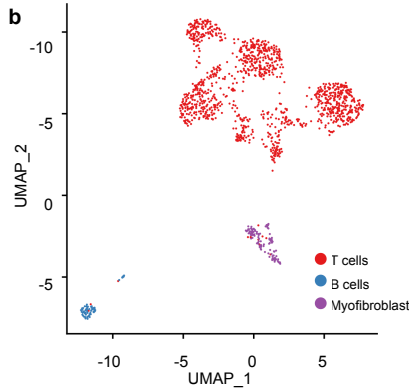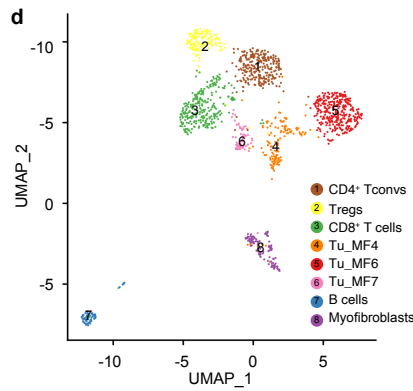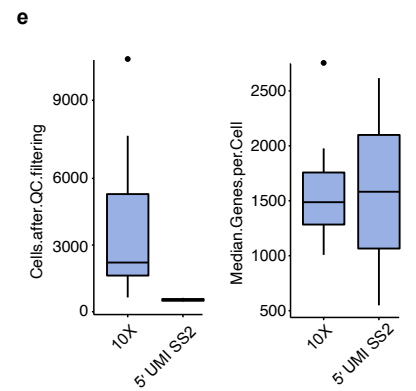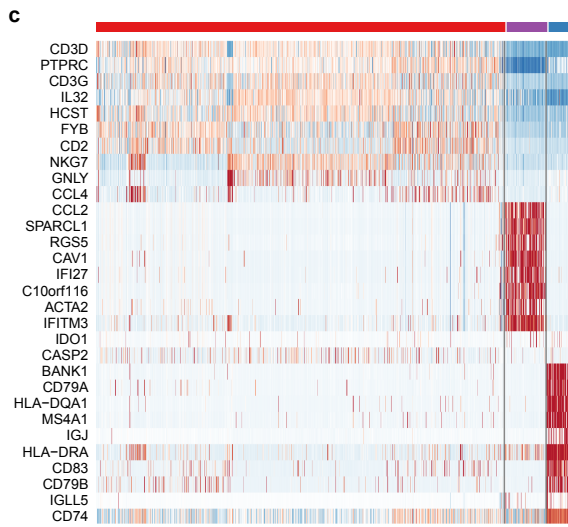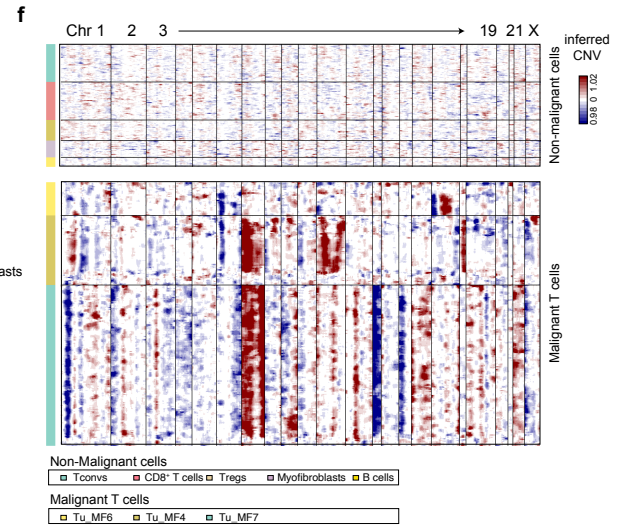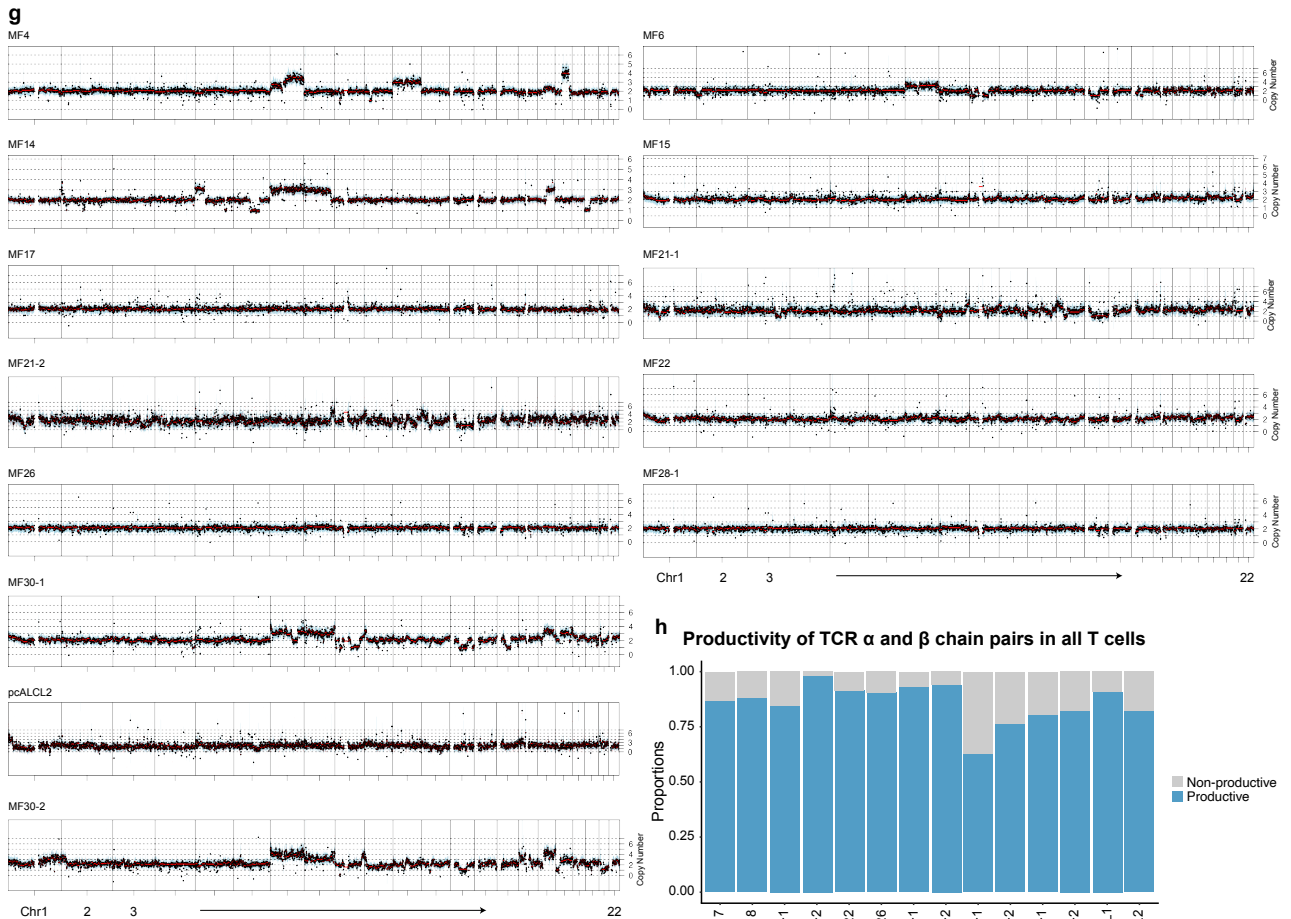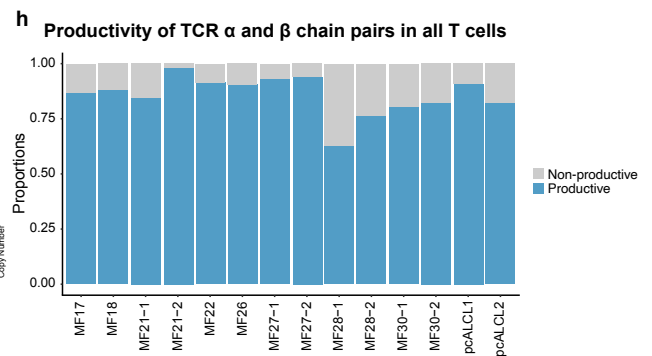



**Supplementary Figure 1. Single-cell transcriptional profiles of all cells from the 5' UMI Smart-Seq2 dataset.**

**(a)** FACS gating strategy of CD45<sup>-</sup>, CD45<sup>+</sup>CD3<sup>-</sup> and CD45<sup>+</sup>CD3<sup>+</sup> subsets from skin lesions of CTCL patients, related to Fig. 1a.

**(b and c)** UMAP plot shows 1,398 high-quality cells in the 5' UMI Smart-Seq2 dataset. Three cell types were defined by cell-specific markers as described previously, with each cell colored by cell type as annotated **(b)**, and malignant T cells were further identified **(c)**.

**(d)** Heatmap shows the expression of the top 10 signature genes in each cell type from the 5' UMI Smart-Seq2 dataset. The expression level was measured as the z-score normalized log<sub>2</sub> level (count+1).

**(e)** Boxplot shows the comparison of the detected cell numbers per sample (left) and the median gene numbers per cell (right) between the 10× Genomics (a total of 58926 cells × 24864 genes) and 5' UMI Smart-Seq2 (a total of 24864 cells × 4733 genes) datasets after quality control filtering. Boxes represent median and interquartile ranges (IQRs), whiskers are 1.5 × IQR, and dots represent subjects outside the IQR range.

**(f)** Large-scale CNVs of single cells from all samples. CNVs were inferred from the 5' UMI Smart-Seq2 dataset.

**(g)** The CNV patterns of 13 samples inferred from whole exome sequencing.

**(h)** The productivity of TCR α and β chain pairs in all T cells of each sample.

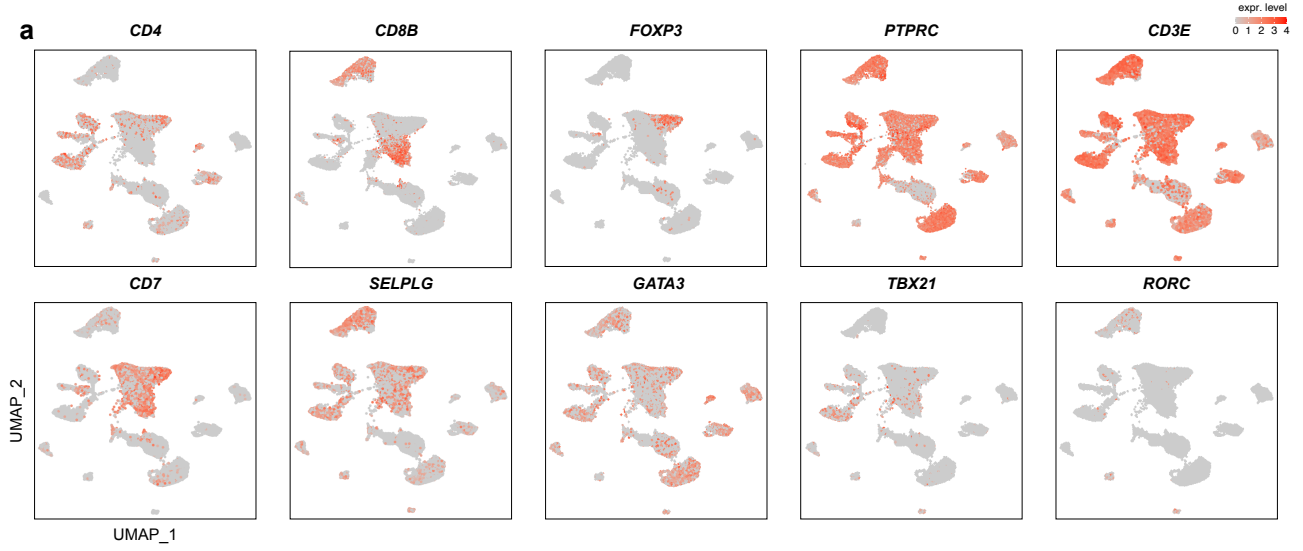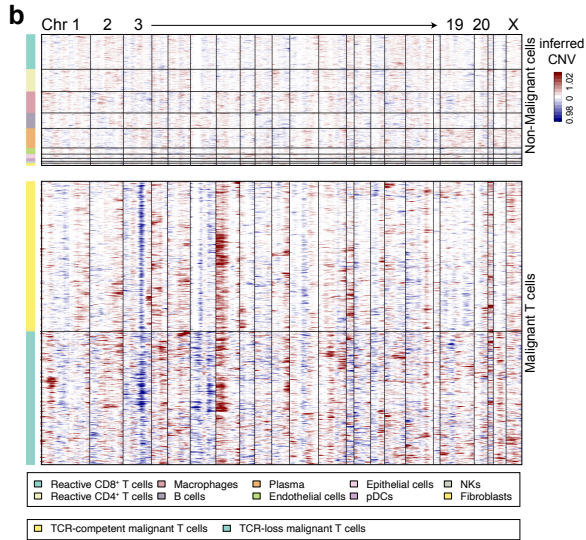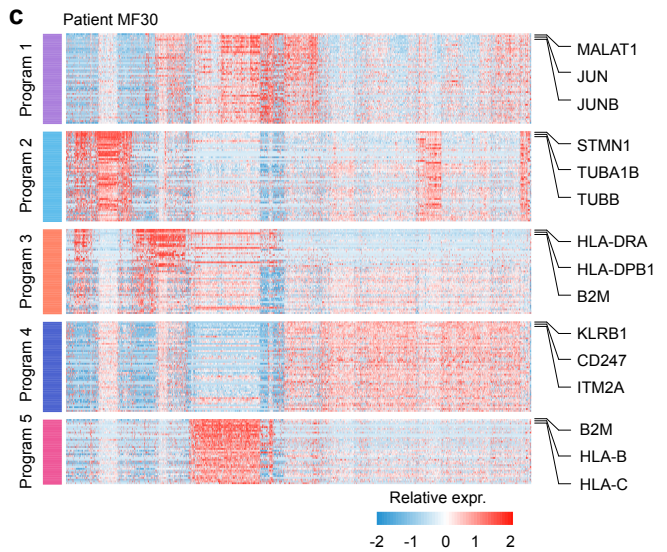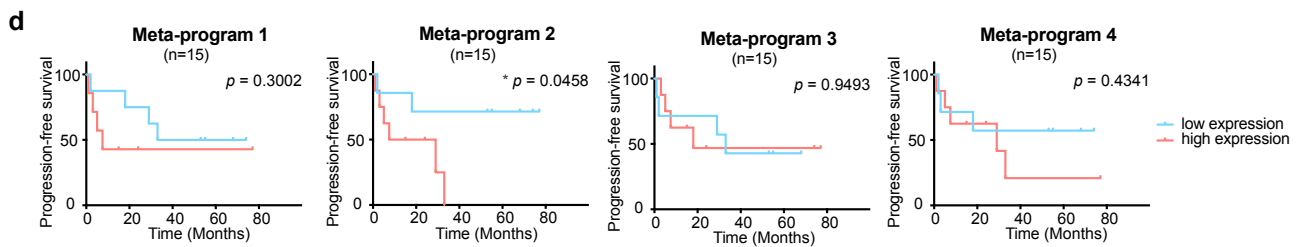

**Supplementary Figure 2. Intra-tumor heterogeneous transcriptional properties of malignant T cells.**

**(a)** UMAP plot shows the expression of canonical T cell markers in all T cells from the 10× Genomics dataset. The color scale represents normalized expression. Gray to red: low to high expression.

**(b)** Large-scale CNVs of single cells from sample MF28-1. CNVs were inferred from the transcriptome.

**(c)** Heatmap shows five gene expression programs deciphered from a representative patient (MF30) using NMF.

**(d)** PFS analysis of an independent cohort of 15 pcALCL patients. Patients were stratified into low and high expression groups according to median values of scores corresponding to the gene signatures of four meta-programs. *P*-values were calculated using the log-rank test.

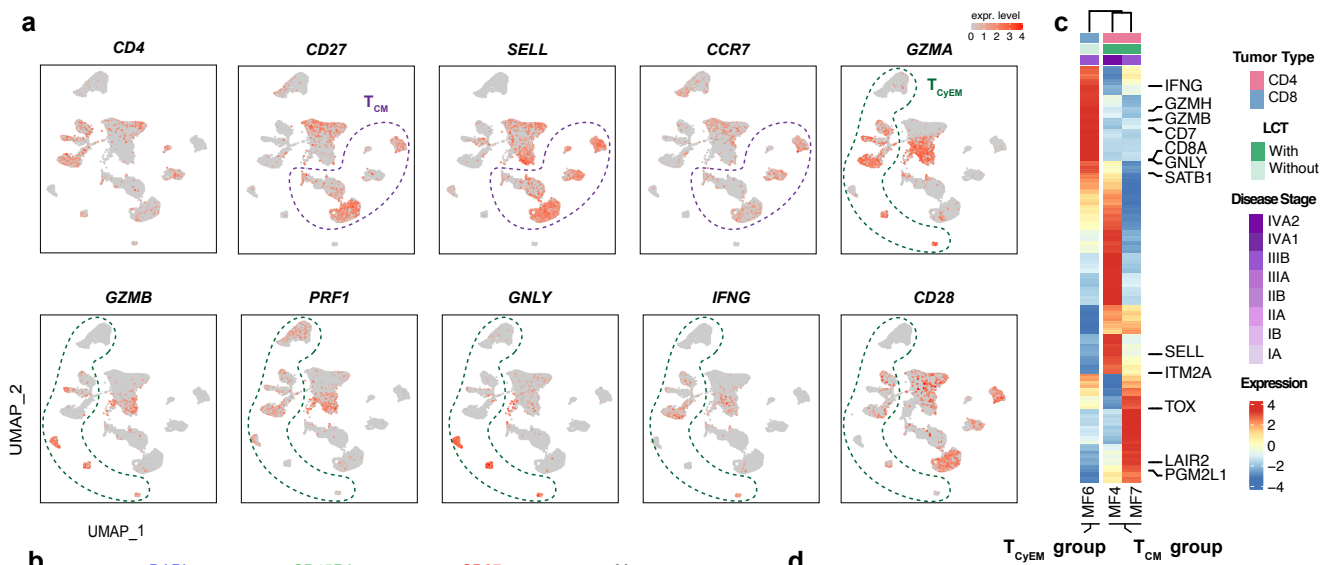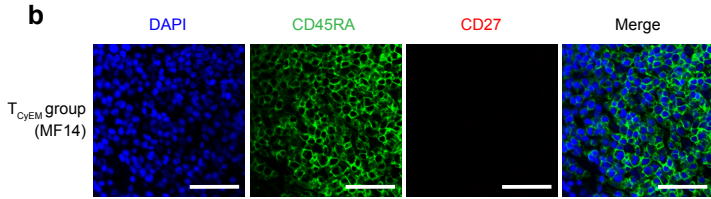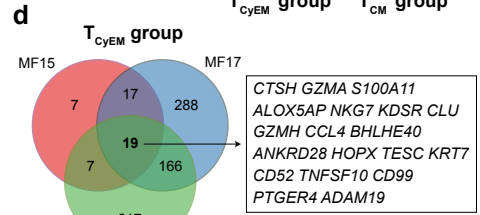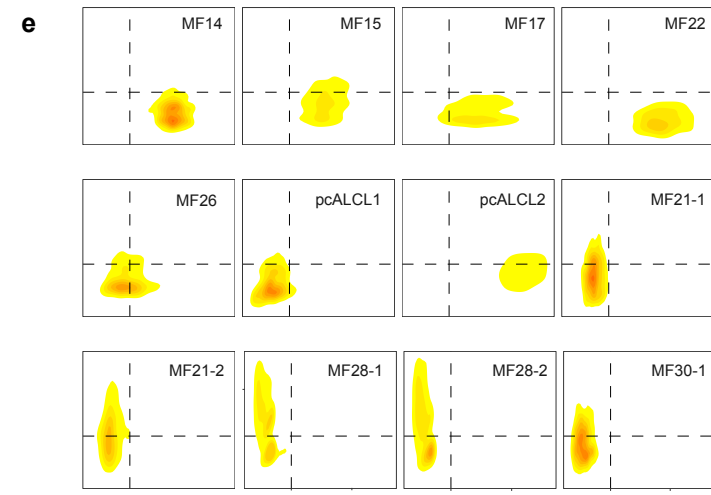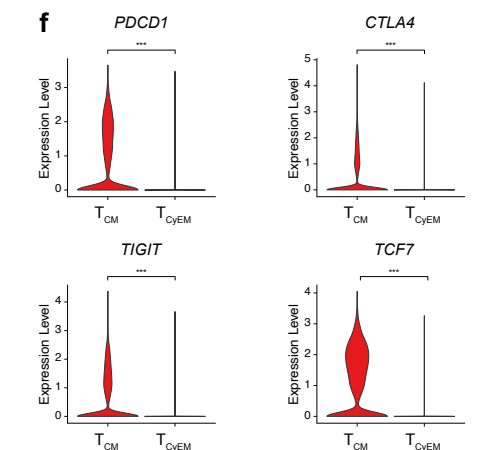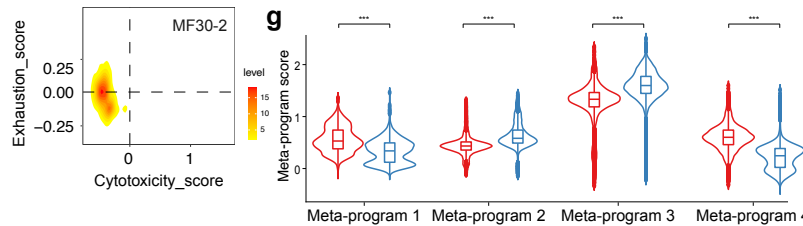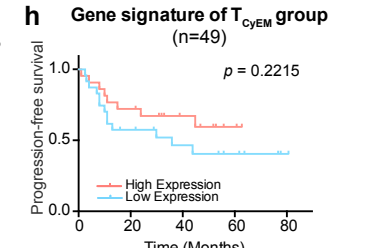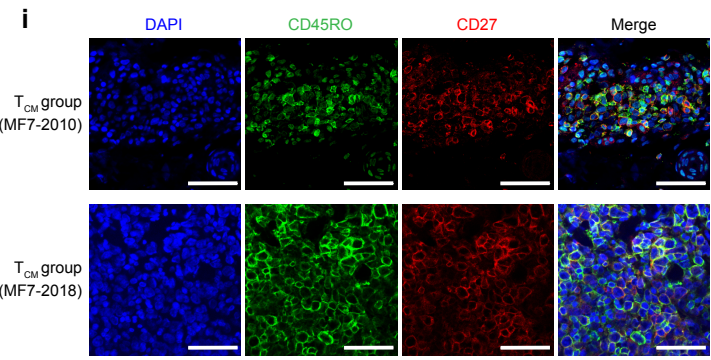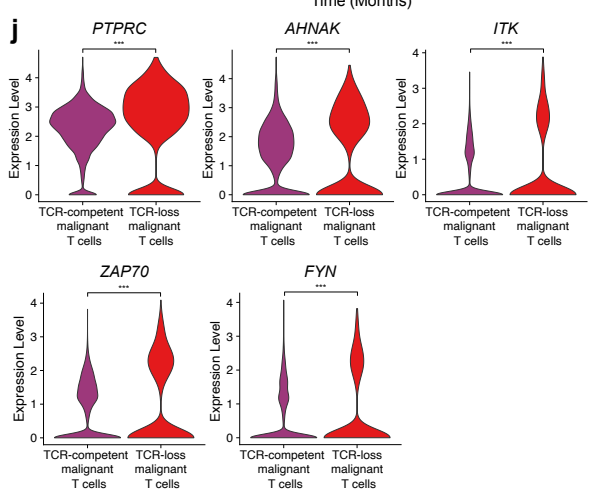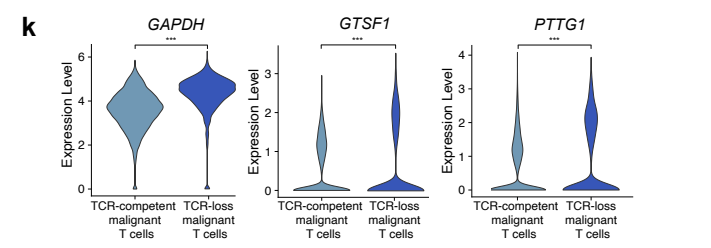

**Supplementary Figure 3. Molecular subtyping with malignant T cell-intrinsic features.**

**(a)** UMAP plots show the gene expression patterns of all T cells from the 10× Genomics dataset. Two subgroups identified in Fig. 4A are highlighted by dashed circles. The color scale represents normalized expression. Gray to red: low to high expression.

**(b)** Immunofluorescence staining of CD45RA (green) and CD27 (red) on paraffin-embedded tissue of patient MF14. DAPI (blue) was used to visualize cell nuclei. Scale bar = 50 μm. Results are representative of three different samples.

**(c)** Heatmap of unsupervised hierarchical clustering shows the average expression of the DEGs between malignant T cells and their respective reactive CD4<sup>+</sup> or CD8<sup>+</sup> T cells in each sample from 3 patients in the 5' UMI Smart-Seq2 dataset ( $\log_2$  fold-change >1.5,  $p < 0.05$ ). The bars above the heatmap show the tumor type, LCT information and disease stage. LCT, large cell transformation.

**(d)** Venn diagram illustrates a 19-gene signature from CD4<sup>+</sup> MF patients in the T<sub>CyEM</sub> group.

**(e)** 2D density plots show the cytotoxicity score and exhaustion score of malignant T cells in each sample from the 10× Genomics dataset.

**(f)** Violin plots show that malignant T<sub>CM</sub> cells expressed a higher level of *PDCDI*, *CTLA4*, *TIGIT*, and *TCF7* in comparison with malignant T<sub>CyEM</sub> cells; Two-sided Mann-Whitney U-test. \*\*\* $p < 0.001$ .  $P = 0$  (all genes).

**(g)** Violin plots show the scores of the four meta-programs in the T<sub>CyEM</sub> and T<sub>CM</sub> group; Two-sided Mann-Whitney U-test.  $P \leq 2.00 \times 10^{-16}$  in the four meta-programs.

**(h)** PFS analysis of an independent cohort of 49 tumor-stage MF patients. Patients were stratified into low expression and high expression groups according to median values of scores corresponding to the 19-gene signature of the T<sub>CyEM</sub> groups identified in Supplementary Fig. 4d.  $P$ -values were calculated using the log-rank test.

**(i)** Immunofluorescence staining of CD45RO (green) and CD27 (red) on thin plaque tissue isolated in 2010 (upper) and tumor tissue isolated in 2018 (lower) from patient MF7. DAPI (blue) was used to visualize cell nuclei. Scale bar = 50 μm. Results are representative of three different samples.

**(j)** Violin plots show that TCR-loss malignant T cells in the T<sub>CyEM</sub> group express higher levels of T cell activation-related genes in comparison with TCR-competent malignant T cells ( $\log_2$  fold-change >0.14, \*\*\* $p < 0.001$ ); Two-sided Mann-Whitney U-test.  $P = 1.11 \times 10^{-10}$  (*PTPRC*),  $4.68 \times 10^{-4}$  (*AHNAK*),  $2.82 \times 10^{-7}$  (*ITK*),  $6.73 \times 10^{-7}$  (*ZAP70*) and  $8.28 \times 10^{-4}$  (*FYN*).

**(k)** Violin plots show that TCR-loss malignant T cells in the T<sub>CM</sub> group express higher levels of *GAPDH*, *GTSF1* and *PTTG1* in comparison with TCR-competent malignant T cells ( $\log_2$  fold change >0.15, \*\*\* $p < 0.001$ ); Two-sided Mann-Whitney U-test.  $P = 2.20 \times 10^{-16}$  (*GAPDH*),  $1.60 \times 10^{-5}$  (*GTSF1*) and  $2.20 \times 10^{-16}$  (*PTTG1*).

Source data for **(d)** are provided in the Source Data file



expr. level  
0 1 2 3 4

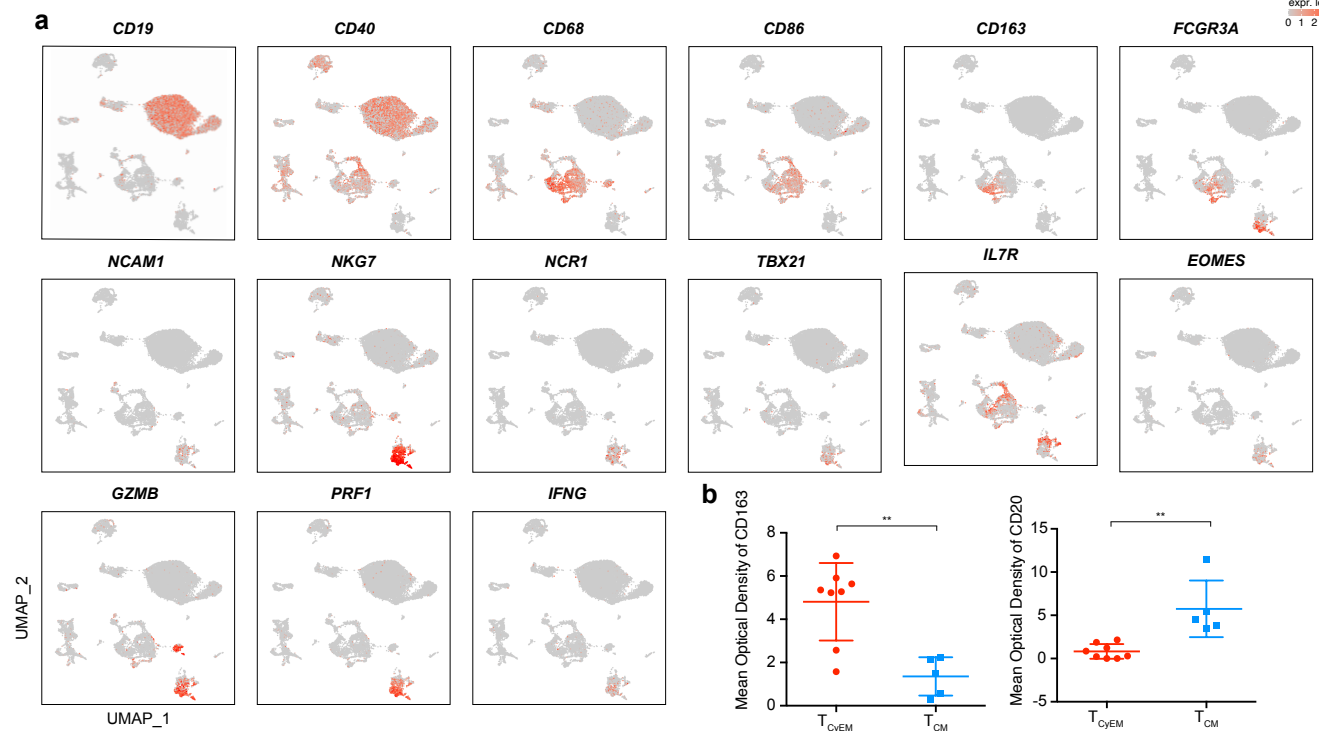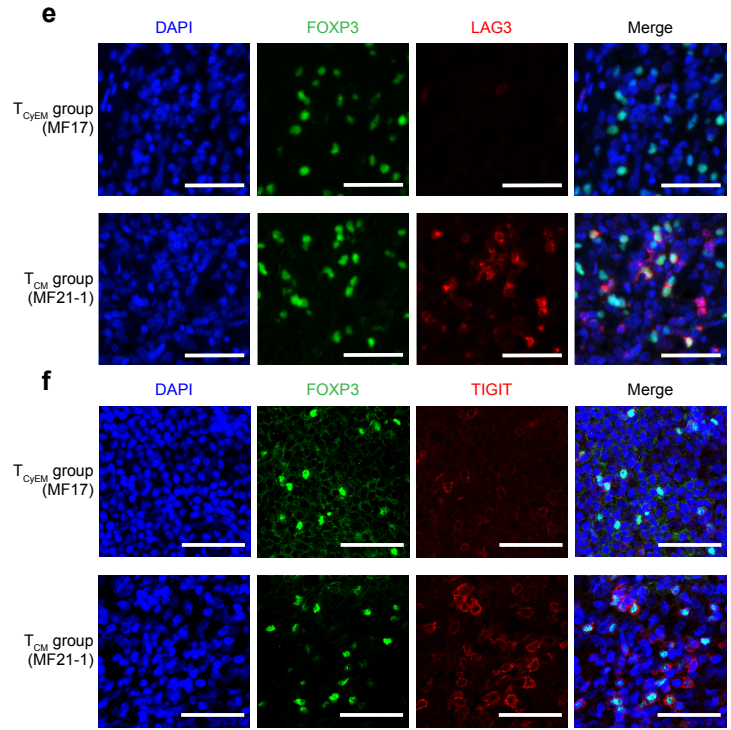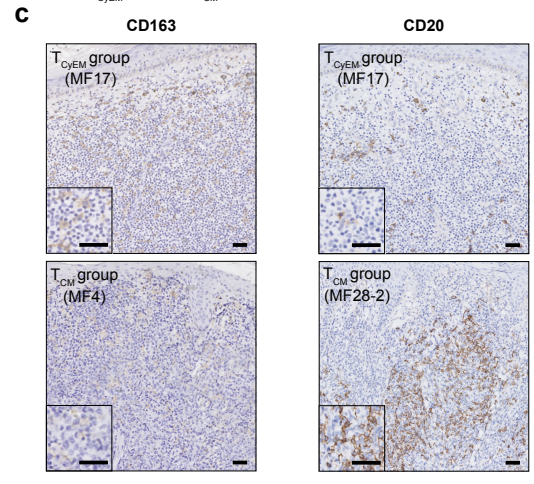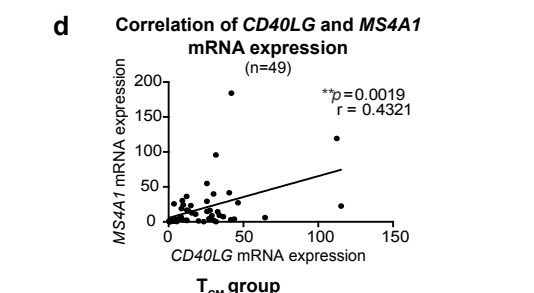

**Supplementary Figure 4. The interaction between malignant T cells and the TME in each subtype.**

**(a)** UMAP plot shows the expression of canonical cell type markers in non-T cells from the 10× Genomics dataset. The color scale represents normalized expression. Gray to red: low to high expression.

**(b)** The mean optical density of CD163 and CD20 in the T<sub>CyEM</sub> (n=8) and T<sub>CM</sub> (n=5) groups. Data are presented as median ± interquartile range. Two-sided Mann-Whitney U-test, \*\* $p < 0.01$ . Each experiment was repeated three times independently with similar results.  $P = 2.20 \times 10^{-3}$  (CD163) and  $1.60 \times 10^{-3}$  (CD20).

**(c)** Representative immunohistochemical staining of CD163 (left) and CD20 (right) on paraffin-embedded tissue from the T<sub>CyEM</sub> and T<sub>CM</sub> groups. Scale bar = 50 μm. Results are representative of three different samples.

**(d)** Correlation analysis of the mRNA expression of *MS4A1* and *CD40LG* in an independent cohort of 49 tumor-stage MF patients.  $P$ -values were calculated using the Spearman rank correlation test.

**(e and f)** Immunofluorescence staining demonstrate that FOXP3<sup>+</sup> Tregs (green) in the T<sub>CM</sub> group exhibit higher expression of LAG3 (red) **(e)** and TIGIT (red) **(f)** compared with the T<sub>CyEM</sub> group. DAPI (blue) was used to visualize cell nuclei. Scale bar = 50 μm. Results are representative of three different samples.

**(g)** Multicolor IHC staining of tumor tissue samples show different TMEs in the two subgroups. (Panel 1) Granzyme A<sup>+</sup> CD4<sup>+</sup> tumorous cells were surrounded by abundant CD163<sup>+</sup> macrophages and CD8<sup>+</sup> T cells within the T<sub>CyEM</sub> group (exemplified by patient MF17), whereas only CD8<sup>+</sup> T cells were found in the surrounding microenvironment in the T<sub>CyEM</sub> group (exemplified by patient MF4). (Panel 2) Few CD20<sup>+</sup> B cells and LAG3<sup>+</sup> FOXP3<sup>+</sup> Tregs were found within the TME of the T<sub>CyEM</sub> group (exemplified by patient MF17), whereas TOX<sup>+</sup> tumorous cells were surrounded by abundant CD20<sup>+</sup> B cells and LAG3<sup>+</sup> FOXP3<sup>+</sup> Tregs in the T<sub>CM</sub> group (exemplified by patient MF28). DAPI (blue) was used to visualize cell nuclei. Scale bar = 100 μm. Results are representative of three different samples.

**Supplementary Table 1. M1 and M2 gene list.**

| <b>M1</b> | <b>M2</b> |
|-----------|-----------|
| CD86      | CSF1R     |
| IL1B      | IL1R2     |
| IRF1      | CTSA      |
| CD40      | CTSB      |
| IDO1      | CTSC      |
| KYNU      | TGFB1     |
|           | CLEC7A    |

**Supplementary Table 2. Sequencing analysis summary of 13 samples from 11 patients subject to WES.**

| Patient ID | Sample | Properly Mapped and Paired Reads (%) | Number of reads (millions) | Mean_Depth | Tumor purity |
|------------|--------|--------------------------------------|----------------------------|------------|--------------|
| MF4        | Tumor  | 99.36%                               | 87.45                      | 101.44     | 0.64         |
|            | Blood  | 99.25%                               | 78.88                      | 99.09      |              |
| MF6        | Tumor  | 99.08%                               | 92.51                      | 110.73     | 0.32         |
|            | Blood  | 99.19%                               | 85.5                       | 100.63     |              |
| MF14       | Tumor  | 98.83%                               | 141.64                     | 201.61     | 0.73         |
|            | Blood  | 98.66%                               | 78.56                      | 108.46     |              |
| MF15       | Tumor  | 98.91%                               | 133.82                     | 186.45     | 0.59         |
|            | Blood  | 98.63%                               | 65.17                      | 89.88      |              |
| MF17       | Tumor  | 99.27%                               | 143.08                     | 204.59     | 0.46         |
|            | Blood  | 99.19%                               | 94.92                      | 132.21     |              |
| MF21-1     | Tumor  | 99.04%                               | 131.64                     | 180.5      | 0.36         |
|            | Blood  | 99.21%                               | 81.41                      | 111.17     |              |
| MF21-2     | Tumor  | 99.19%                               | 170.36                     | 249.51     | 0.31         |
|            | Blood  | 99.21%                               | 81.41                      | 111.17     |              |
| MF22       | Tumor  | 98.71%                               | 155.06                     | 211.17     | 0.44         |
|            | Blood  | 98.51%                               | 77.17                      | 102.99     |              |
| MF26       | Tumor  | 98.96%                               | 139.24                     | 184.53     | 0.49         |
|            | Blood  | 99.09%                               | 76.68                      | 108.09     |              |
| MF28-1     | Tumor  | 99.18%                               | 152.46                     | 229.51     | 0.41         |
|            | Blood  | 98.97%                               | 76.52                      | 112.34     |              |
| MF30-1     | Tumor  | 98.80%                               | 132.45                     | 181.23     | 0.54         |
|            | Blood  | 98.63%                               | 73.14                      | 103.37     |              |
| MF30-2     | Tumor  | 98.81%                               | 133.05                     | 172.6      | 0.41         |
|            | Blood  | 98.63%                               | 73.14                      | 103.37     |              |
| P2         | Tumor  | 98.75%                               | 194.42                     | 256.37     | 0.21         |
|            | Blood  | 98.33%                               | 68.58                      | 96.78      |              |
