# Supplementary material for: Single-cell transcriptomics links malignant T cells to the tumor immune landscape in cutaneous T cell lymphoma
Source: PubMed Central journal article supplement (PMC8894386; doi:10.1038/s41467-022-28799-3), 2022-03-03
Supplement: 41467_2022_28799_MOESM5_ESM.pdf [file 41467_2022_28799_MOESM5_ESM.pdf]

## Reporting Summary

Nature Portfolio wishes to improve the reproducibility of the work that we publish. This form provides structure for consistency and transparency in reporting. For further information on Nature Portfolio policies, see our [Editorial Policies](#) and the [Editorial Policy Checklist](#).

### Statistics

For all statistical analyses, confirm that the following items are present in the figure legend, table legend, main text, or Methods section.

n/a Confirmed

- The exact sample size ( $n$ ) for each experimental group/condition, given as a discrete number and unit of measurement
- A statement on whether measurements were taken from distinct samples or whether the same sample was measured repeatedly
- The statistical test(s) used AND whether they are one- or two-sided  
*Only common tests should be described solely by name; describe more complex techniques in the Methods section.*
- A description of all covariates tested
- A description of any assumptions or corrections, such as tests of normality and adjustment for multiple comparisons
- A full description of the statistical parameters including central tendency (e.g. means) or other basic estimates (e.g. regression coefficient) AND variation (e.g. standard deviation) or associated estimates of uncertainty (e.g. confidence intervals)
- For null hypothesis testing, the test statistic (e.g.  $F$ ,  $t$ ,  $r$ ) with confidence intervals, effect sizes, degrees of freedom and  $P$  value noted  
*Give  $P$  values as exact values whenever suitable.*
- For Bayesian analysis, information on the choice of priors and Markov chain Monte Carlo settings
- For hierarchical and complex designs, identification of the appropriate level for tests and full reporting of outcomes
- Estimates of effect sizes (e.g. Cohen's  $d$ , Pearson's  $r$ ), indicating how they were calculated

*Our web collection on [statistics for biologists](#) contains articles on many of the points above.*

### Software and code

Policy information about [availability of computer code](#)

Data collection

Data analysis

For manuscripts utilizing custom algorithms or software that are central to the research but not yet described in published literature, software must be made available to editors and reviewers. We strongly encourage code deposition in a community repository (e.g. GitHub). See the Nature Portfolio [guidelines for submitting code & software](#) for further information.

### Data

Policy information about [availability of data](#)

All manuscripts must include a [data availability statement](#). This statement should provide the following information, where applicable:

- Accession codes, unique identifiers, or web links for publicly available datasets
- A description of any restrictions on data availability
- For clinical datasets or third party data, please ensure that the statement adheres to our [policy](#)

All relevant data are available in publicly accessible repositories. scRNA-seq reads were aligned to the hg19 reference genome, and scRNA-TCR data were aligned to the vdj-GRCh38 reference genome. The raw data from the scRNA-seq, TCR-seq and bulk exome sequencing experiments have been deposited in the Genome Sequence Archive for human (GSA-Human) under accession number HRA000166 [https://ngdc.cnbc.ac.cn/gsa-human/browse/HRA000166]. The raw bulk RNA-seq

data have been deposited in the Gene Expression Omnibus database under accession numbers GSE168508 [https://www.ncbi.nlm.nih.gov/geo/query/acc.cgi?acc=GSE168508] and GSE109620 [https://www.ncbi.nlm.nih.gov/geo/query/acc.cgi?acc=GSE109620]. To gain access to the raw sequencing data from scRNA-seq, TCR-seq and bulk exome sequencing data, please submit requests to the GSA-Human online page for this study [https://ngdc.cncb.ac.cn]. The remaining data are available within the Article, Supplementary Information or Source Data file. The source data underlying Figs. 1c, g, 2e, g, 3j, k, 4d, 5c, 6a, c and Supplementary Fig. 3d are provided in the Source Data file.

Since October 2019, to comply with the "Guidance of the Ministry of Science and Technology (MOST) for the Review and Approval of Human Genetic Resources", we are required to deposit the genomic data of Chinese patients under a controlled access at the Genome Sequence Archive (GSA) in Beijing Institute of Genomics Data Center. As you can see here <http://gsa.big.ac.cn/>, The Genome Sequence Archive (GSA) is a data repository for archiving raw sequence reads. It accepts data submissions from all over the world and provides free access to global scientific communities. GSA is at the National Genomics Data Center, Beijing Institute of Genomics, Chinese Academy of Sciences. It is a famous, stable, and community supported data repository. Also, GSA is one of the recommended data repositories of Springer Nature publishing group.

In this work, most of the single cell sequencing data were collected after October 2019, so they have been deposited to GSA under a controlled access; some bulk sequencing data were collected before October 2019, so they could be deposited to GEO.

## Field-specific reporting

Please select the one below that is the best fit for your research. If you are not sure, read the appropriate sections before making your selection.

Life sciences  Behavioural & social sciences  Ecological, evolutionary & environmental sciences

For a reference copy of the document with all sections, see [nature.com/documents/nr-reporting-summary-flat.pdf](https://www.nature.com/documents/nr-reporting-summary-flat.pdf)

## Life sciences study design

All studies must disclose on these points even when the disclosure is negative.

|                 |                                                                                                                                                                                                                                                                                                                                                                                                                                                                                                                              |
|-----------------|------------------------------------------------------------------------------------------------------------------------------------------------------------------------------------------------------------------------------------------------------------------------------------------------------------------------------------------------------------------------------------------------------------------------------------------------------------------------------------------------------------------------------|
| Sample size     | No standard methods were used to predetermine sample size. We used all the samples available in each dataset. A total of fifteen CTCL patients with informed consent were recruited from the Skin Lymphoma Clinic of Peking University First Hospital in the period from 2018 to 2019. Only patients with clear diagnoses, detailed clinical and pathological information were recruited in our study. The sample sizes are sufficient to provide stable single cell clustering results and to perform statistical analysis. |
| Data exclusions | No exclusion was applied to the uploaded raw data. For the final count matrix, we excluded cells based on pre-established criteria for single-cells: we excluded low quality samples and contaminating cells. Only genes detected in at least 10 cells were retained. We filtered out cells with fewer than 500 or more than 5,000 detected genes and those with a high mitochondrial content (>10%). The criteria are comprehensively detailed in the relevant Methods section.                                             |
| Replication     | The immunohistochemistry and immunofluorescence staining were performed on all samples and repeated at least three times. The staining results were calculated and verified by at least two researchers, and reproducible results were obtained.                                                                                                                                                                                                                                                                             |
| Randomization   | All patients who meet the criteria in our study were recruited in the cohort. No randomization was performed due to the nature of the study. In order to avoid batch effects, skin lesions were always processed in the same batch.                                                                                                                                                                                                                                                                                          |
| Blinding        | The investigators handling the samples were not blinded during data collection and processing as the nature of cutaneous lymphoma was visible. Besides, blinding wasn't relevant as all individuals were compared to each other.                                                                                                                                                                                                                                                                                             |

## Reporting for specific materials, systems and methods

We require information from authors about some types of materials, experimental systems and methods used in many studies. Here, indicate whether each material, system or method listed is relevant to your study. If you are not sure if a list item applies to your research, read the appropriate section before selecting a response.

### Materials & experimental systems

| n/a                                 | Involved in the study                                           |
|-------------------------------------|-----------------------------------------------------------------|
| <input type="checkbox"/>            | <input checked="" type="checkbox"/> Antibodies                  |
| <input type="checkbox"/>            | <input checked="" type="checkbox"/> Eukaryotic cell lines       |
| <input checked="" type="checkbox"/> | <input type="checkbox"/> Palaeontology and archaeology          |
| <input checked="" type="checkbox"/> | <input type="checkbox"/> Animals and other organisms            |
| <input type="checkbox"/>            | <input checked="" type="checkbox"/> Human research participants |
| <input checked="" type="checkbox"/> | <input type="checkbox"/> Clinical data                          |
| <input checked="" type="checkbox"/> | <input type="checkbox"/> Dual use research of concern           |

### Methods

| n/a                                 | Involved in the study                              |
|-------------------------------------|----------------------------------------------------|
| <input checked="" type="checkbox"/> | <input type="checkbox"/> ChIP-seq                  |
| <input type="checkbox"/>            | <input checked="" type="checkbox"/> Flow cytometry |
| <input checked="" type="checkbox"/> | <input type="checkbox"/> MRI-based neuroimaging    |

## Antibodies

|                 |                                                                                                                                                                                                                                                                                                                                                                                         |
|-----------------|-----------------------------------------------------------------------------------------------------------------------------------------------------------------------------------------------------------------------------------------------------------------------------------------------------------------------------------------------------------------------------------------|
| Antibodies used | CD4 (1:100, Abcam, ab133616, clone EPR6855), TCR $\alpha$ (1:100, H-1, santa, sc-515719), CD45RO (1:400, CST, 55618s, clone UCHL1), CD27 (1:500, Abcam, ab131254, clone EPR8569), granzyme A (1:100, Abcam, ab209205, clone EPR20161), granzyme B (1:800, CST, 17215s, clone D2H2F), perforin (1:10, eBioscience, 14-9994-82, clone deltaG9), granulysin (1:250, Abcam, ab241333, clone |
|-----------------|-----------------------------------------------------------------------------------------------------------------------------------------------------------------------------------------------------------------------------------------------------------------------------------------------------------------------------------------------------------------------------------------|

EPR22110-101), TOX (1:300, Abcam, ab237009, clone NAN448B), LGALS9 (1:100, Abcam, ab227046, clone EPR22214), CD40 (1:250, Abcam, ab224639, clone EPR20735), CD40L (1:100, Abcam, ab257319, clone CD40LG/2761), CD20 (1:50, Abcam, ab78237, clone EP459Y), FOXP3 (1:100, Abcam, ab20034, clone 236A/E7), LAG3 (1:1000, Abcam, ab209236, clone EPR20261), CD163 (1:500, Abcam, ab182422, clone EPR19518), CD8 (1:1000, Proteintech, 66868-1-1g, clone 1G2B10) and CD45RA (1:300, Millipore, 05-1413, clone MEM 56), TIGIT (1:500, CST, 99567T, clone E5Y1W), CD45-PE (1:1000, Invitrogen, 12-0459-42, clone HI30) .

## Validation

All the antibodies used in this study were commercial antibodies and were only used for applications, with validation procedures described on the following sites of the manufactures:

<https://www.abcam.cn/cd4-antibody-epr6855-ab133616.html>  
<https://www.scbt.com/p/tcr-alpha-antibody-h-1?requestFrom=search>  
<https://www.cellsignal.com/products/primary-antibodies/cd45ro-uchl1-mouse-mab-ihc-specific/55618>  
<https://www.abcam.cn/cd27-antibody-epr8569-ab131254.html>  
<https://www.abcam.cn/granzyme-a-antibody-epr20161-ab209205.html>  
<https://www.cellsignal.com/products/primary-antibodies/granzyme-b-d2h2f-rabbit-mab/17215>  
<https://www.thermofisher.com/antibody/product/Perforin-Antibody-clone-dG9-delta-G9-Monoclonal/14-9994-82>  
<https://www.abcam.cn/gnlygranulysin-antibody-epr22110-101-ab241333.html>  
<https://www.abcam.cn/tox-antibody-nan448b-ab237009.html>  
<https://www.abcam.cn/galectin-9gal-9-antibody-epr22214-ab227046.html>  
<https://www.abcam.cn/cd40-antibody-epr20735-ab224639.html>  
<https://www.abcam.cn/trapcd40l-antibody-cd40lg2761-ab257319.html>  
<https://www.abcam.cn/cd20-antibody-ep459y-ab78237.html>  
<https://www.abcam.cn/foxp3-antibody-236ae7-ab20034.html>  
<https://www.abcam.cn/lag-3-antibody-epr20261-ab209236.html>  
<https://www.abcam.cn/cd163-antibody-epr19518-ab182422.html>  
<https://www.ptglab.com/products/CD8A-Antibody-66868-1-1g.htm>  
<https://www.sigmaldrich.cn/CN/zh/product/mmm/051413>  
<https://www.cellsignal.com/products/primary-antibodies/tigit-e5y1w-xp-rabbit-mab/99567>  
<https://www.thermofisher.com/antibody/product/CD45-Antibody-clone-HI30-Monoclonal/12-0459-42?imageId=89487>

## Eukaryotic cell lines

### Policy information about cell lines

## Cell line source(s)

MJ, PB2B, Myla, Hut78 and SZ4 were generous gifts from Youwen Zhou (Department of Dermatology and Skin Science, University of British Columbia); Mac-1A and Mac-2A were generous gifts from Marshall E. Kadin (School of Medicine, Boston University).

## Authentication

Cell lines were authenticated by short tandem repeat (STR) profiling.

## Mycoplasma contamination

We confirmed that all cell lines were negative for mycoplasma contamination.

Commonly misidentified lines  
(See [ICLAC](#) register)

No commonly misidentified cell lines were used.

## Human research participants

### Policy information about studies involving human research participants

## Population characteristics

| Sample ID | Gender | Status | Age | Diagnosis                                                     | TNMB      | Stage |
|-----------|--------|--------|-----|---------------------------------------------------------------|-----------|-------|
| MF4       | male   | Dead   | 71  | CD4+ Mycosis fungoides(MF)                                    | T3N3M0B0  |       |
| MF6       | female | Dead   | 79  | CD8+ MF                                                       | T3N0M0B0  |       |
| MF7       | female | Alive  | 56  | CD4+ MF                                                       | T3N1M0B0  |       |
| MF14      | female | Alive  | 31  | CD8+ MF                                                       | T2bN1M0B0 |       |
| MF15      | male   | Alive  | 35  | CD4+ MF                                                       | T2bN0M0B0 |       |
| MF17      | male   | Alive  | 36  | CD4+ MF                                                       | T3N1M0B0  |       |
| MF18      | male   | Alive  | 70  | CD4+ MF                                                       | T3N3M0B1  |       |
| MF21      | male   | Alive  | 79  | CD4+ MF                                                       | T3N2M0B0  |       |
| MF22      | male   | Alive  | 71  | CD4+ MF                                                       | T2bN0M0B0 |       |
| MF26      | male   | Alive  | 15  | CD4+ MF                                                       | T2bN1M0B0 |       |
| MF27-1    | female | Alive  | 57  | CD4+ MF                                                       | T3N1M0B0  |       |
| MF28      | male   | Alive  | 60  | CD4+ MF                                                       | T4N2M0B1  |       |
| MF30      | female | Alive  | 48  | CD4+ MF                                                       | T3N1M0B0  |       |
| pcALCL    | female | Alive  | 67  | CD8+ primary cutaneous anaplastic large cell lymphoma(pcALCL) | T2bN0M0B0 |       |
| pcALCL2   | female | Alive  | 41  | CD4+ pcALCL                                                   | T2bN0M0B0 |       |

## Recruitment

All recruited patients who fulfilled the 2018 WHO/EORTC classification criteria were recruited in our study. All diagnoses were verified by at least two dermatopathologists according to the criteria. Only patients with clear diagnoses, detailed clinical and pathological information were included. Patients were selected if they were treatment naïve or did not receive anti-lymphoma therapy at least 6 months prior to the biopsy. Finally, a total of fifteen CTCL patients with informed consent were recruited from the Skin Lymphoma Clinic of Peking University First Hospital in the period from 2018 to 2019.

## Ethics oversight

All participants provided written consent for specimen collection and analysis under the study protocol approved by the

Note that full information on the approval of the study protocol must also be provided in the manuscript.

## Flow Cytometry

### Plots

Confirm that:

- The axis labels state the marker and fluorochrome used (e.g. CD4-FITC).
- The axis scales are clearly visible. Include numbers along axes only for bottom left plot of group (a 'group' is an analysis of identical markers).
- All plots are contour plots with outliers or pseudocolor plots.
- A numerical value for number of cells or percentage (with statistics) is provided.

### Methodology

Sample preparation

Each fresh tissue sample used for tissue dissociation was placed in a 10-mL sterile Petri dish with cold phosphate-buffered saline (PBS) (Sigma-Aldrich, P5119) and washed three times. The tissue was minced into pieces (<1 mm<sup>3</sup>) on ice and placed into 10 mL serum-free RPMI-1640 media supplemented with 200 U/mL collagenase (Sigma-Aldrich, C9891), 10 mM HEPES (Gibco, 15630-080), 1mM Na-Pyruvate (Gibco, 11360-070), 0.01% DNase (BioLabs, M0303S), 1% penicillin/streptomycin (Sigma-Aldrich) and 25 µg/mL gentamicin (Sigma-Aldrich, G1914) within minimum ischemic time. To obtain single-cell suspensions with a high viability rate, the solution was transferred into a gentleMACS C Tube (Miltenyi Biotec, 130-093-237) and placed into a gentleMACS octo dissociator (Miltenyi Biotec, 130-095-937), in which it was incubated for 45 min at 37 °C according to the manufacturer's instructions. After digestion, the suspension was filtered using a Falcon 40-µm cell strainer (Corning, 352340) and gently added to a new 15-mL centrifuge tube with 10 mL PBS. Next, 10 µL cell suspension was used to confirm the cell viability with trypan blue staining (Solarbio, C0040). The sample was then centrifuged at 110 × g for 10 min and the supernatant was discarded. The cell pellet was resuspended with 200 µL cold serum-free PBS to prepare it for cell staining and flow cytometry.

Instrument

The single-cell suspension was sorted using a MoFlo Astrios (Beckman Coulter).

Software

FlowJo software (v10.7.1, BD Inc, USA) was used to analyze flow cytometry data.

Cell population abundance

We ensured that the initial gate was used to sort a cell count of 100,000 cells and collected the relevant cell population.

Gating strategy

Samples were compensated by single color stains. To remove doublets, single cells were gated by standard forward scatter height (FSC-H) versus width (FSC-W) and side scatter height (SSC-H) versus width (SSC-W). We sorted the 7-AAD- population to obtain viable cells. We sorted all T cell populations within the CD45+CD3+ gate. To elucidate the tumor microenvironment, we also sorted other subtypes disproportionately, including the non-T immune cell population (CD45+CD3-) and non-immune cell population (CD45-).

- Tick this box to confirm that a figure exemplifying the gating strategy is provided in the Supplementary Information.
